# Supplementary material for: The allosteric AKT inhibitor MK2206 shows a synergistic interaction with chemotherapy and radiotherapy in glioblastoma spheroid cultures
Source: Springer Nature journal article supplement (doi:10.1186/s12885-017-3193-9), 2017-03-21

# A. Invasion MK+RT

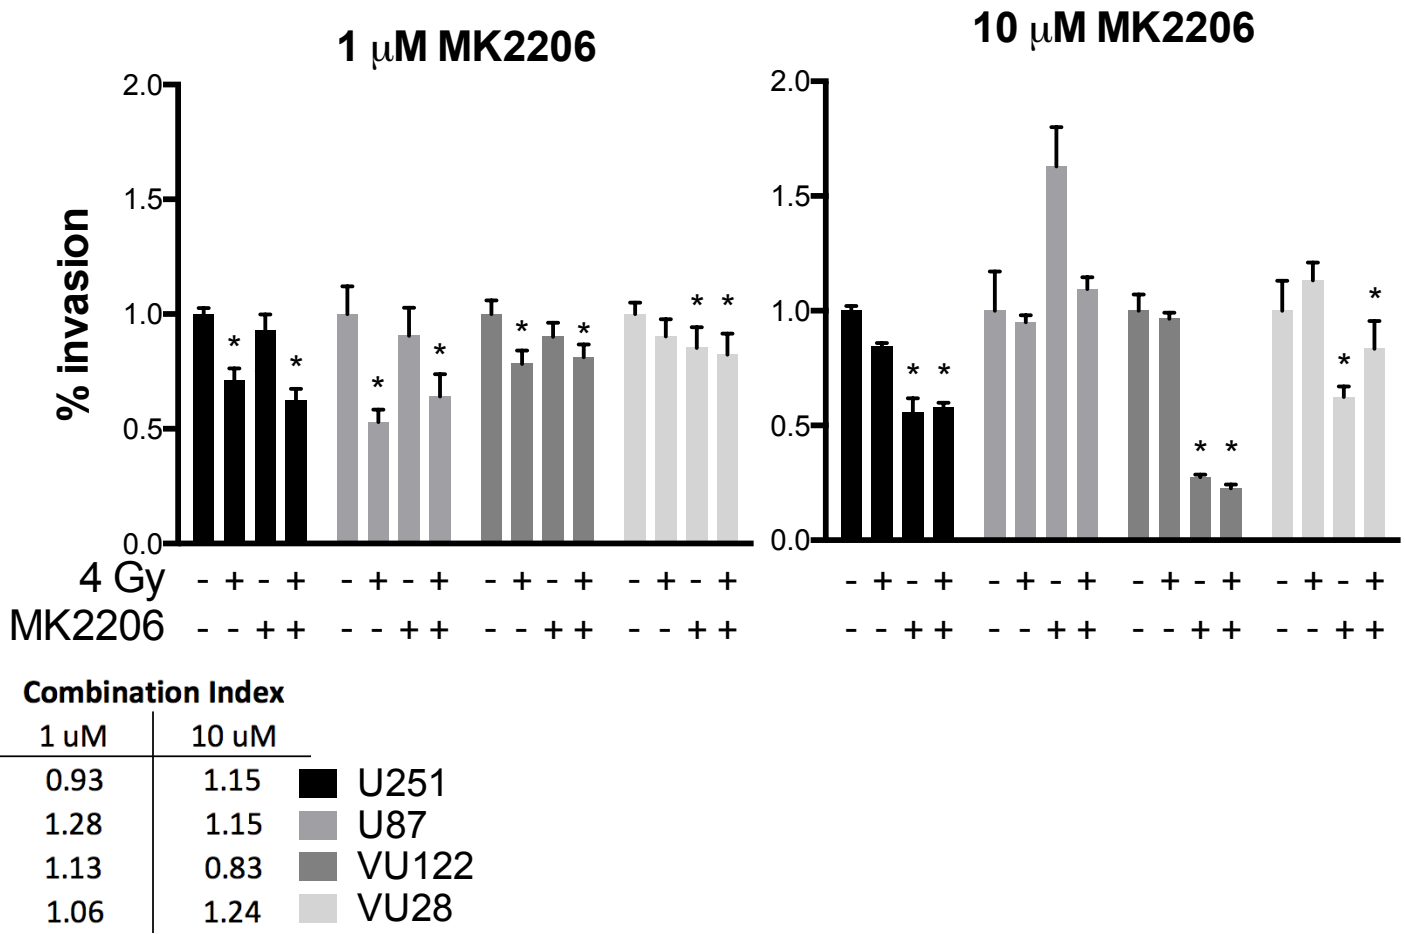

# B. Migration (wound healing (Left) spheroid outgrowth (right) U87 cells

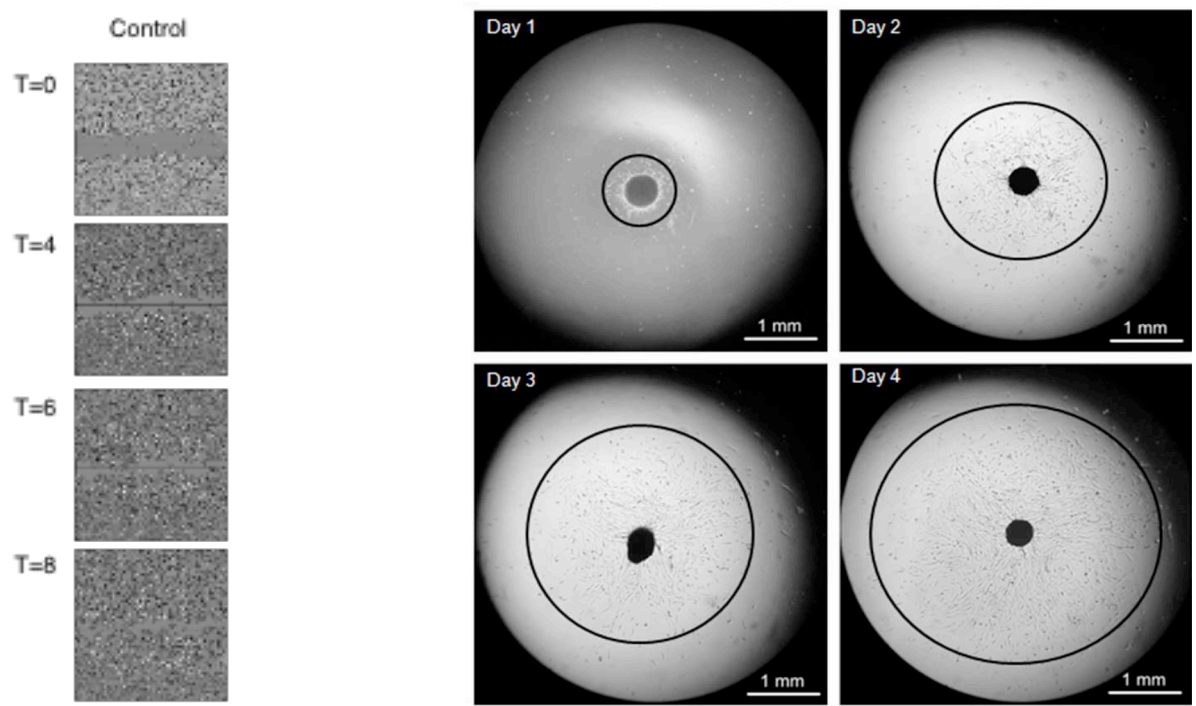

Supplement: MOESM1 [file 12157642]
